# Supplementary material for: Effect of Pre-Existing Sarcopenia on Oncological Outcomes for Oral Cavity Squamous Cell Carcinoma Undergoing Curative Surgery: A Propensity Score-Matched, Nationwide, Population-Based Cohort Study
Source: MDPI journal article supplement (doi:10.3390/cancers14133246), 2022-07-01

|                      |      |             |        |      |             |        |      |             |        |      |             |        |
|----------------------|------|-------------|--------|------|-------------|--------|------|-------------|--------|------|-------------|--------|
| Nonsarcopenia (Ref.) | 1    |             |        | 1    |             |        | 1    |             |        | 1    |             |        |
| Sarcopenia           | 1.08 | (1.02,1.15) | 0.0342 | 1.07 | (1.03,1.20) | 0.0148 | 1.08 | (1.03,1.16) | 0.0003 | 1.11 | (1.04,1.26) | 0.0002 |

RT, radiotherapy; CCRT, concurrent chemoradiotherapy; CCI, Charlson comorbidity index; AJCC, American Joint Committee on Cancer; y, years old; pT, pathologic tumor stages; pN, pathologic nodal stages; Ref., reference group; CI, confidence interval; HR, hazard ratio.

\*All the aforementioned variables in Table 2 were used in multivariate analysis.

**Supplemental Figure S1.** Kaplan–Meier overall cumulative locoregional recurrence curves for the propensity score–matched sarcopenia and nonsarcopenia groups (controls).

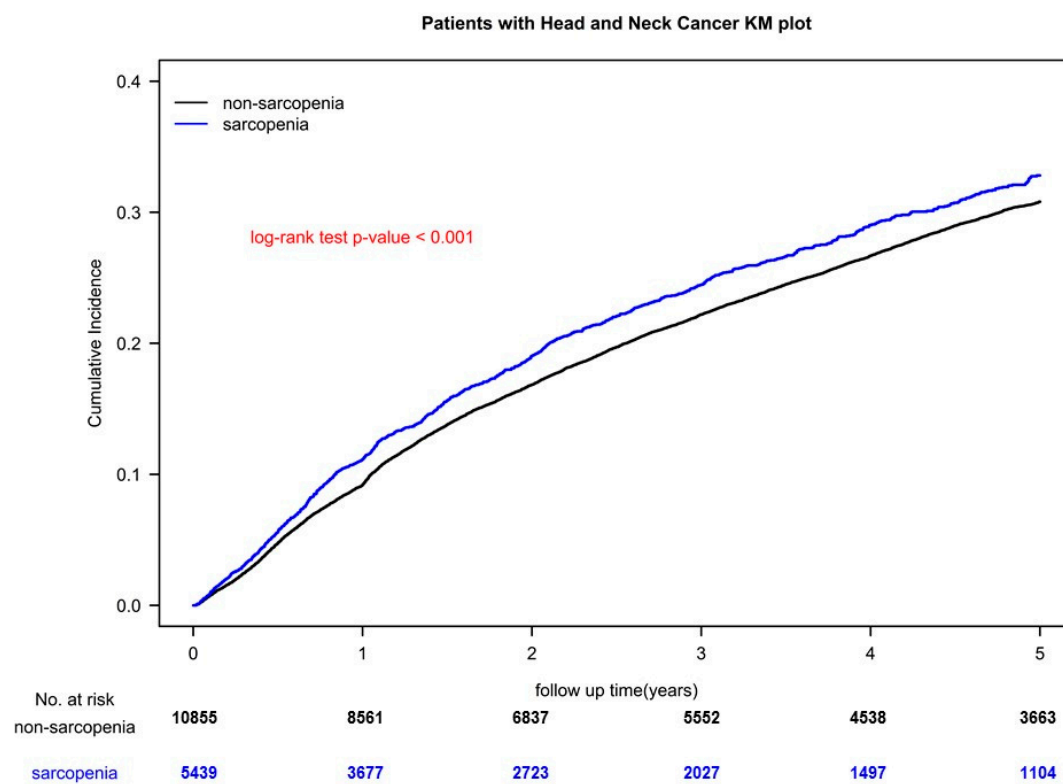

**Supplemental Figure S2.** Kaplan–Meier overall cumulative distant metastasis curves for the propensity score–matched sarcopenia and nonsarcopenia groups (controls).

Patients with Head and Neck Cancer KM plot

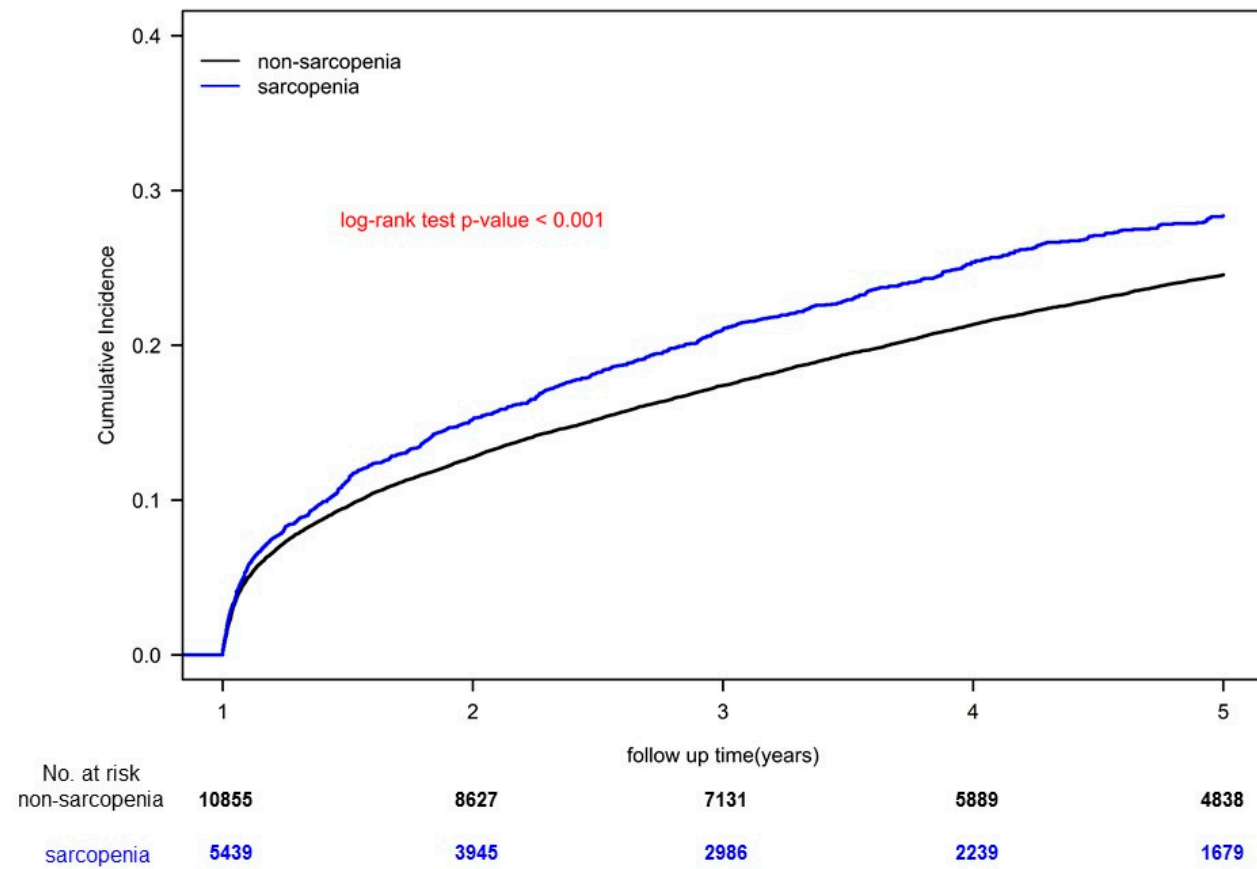

Supplement: s1 [file s1]
